# Supplementary material for: Temperature self-compensation thin film strain gauges based on nano-SiO2/AgNP composites
Source: Royal Society of Chemistry journal article supplement (doi:10.1039/d4tc01645a), 2024-01-01
Supplement: d4tc01645a1.pdf [file d4tc01645a1.pdf]

## Supplementary information

Temperature Self-Compensation Thin Film Strain Gauges Based on nano-SiO<sub>2</sub>/AgNPs  
Composite

Yang Zhao\*, Jin Liu, Yuhuang Ying, Hongyu Chen, Wenxuan Wang, Sijie Zhang,  
Zhenyin Hai and Daoheng Sun

Y. Zhao, J. Liu, Y. H. Ying, H. Y. Chen, W. X. Wang, S. J. Zhang, D. H. Sun  
Pen-Tung Sah Institute of Micro-Nano Science and Technology, Xiamen University,  
Xiamen 361102, PR China  
E-mail: zhaoy@xmu.edu.cn (Y. Z.)

Y. Zhao  
Department of Shenzhen Research Institute of Xiamen University, Shenzhen 518000,  
China

Z. Y. Hai  
School of Aerospace Engineering, Xiamen University, Xiamen 361102, China, PR China

**Table S1** Performance comparison of the sensor with near-zero-TCR strain sensors prepared by functional ink reported in the literature.

| Sensor Materials                  | Substrate                      | Process                   | Curing temperature of sensor materials (°C) | Maximum detectable strain (micro-strain is underline) | GF          | TCR (ppm /°C) | Ref              |
|-----------------------------------|--------------------------------|---------------------------|---------------------------------------------|-------------------------------------------------------|-------------|---------------|------------------|
| Silver/carbon                     | PET                            | screen-printed            | 130                                         | <u>0.08%</u>                                          | 7.7         | Unclear       | 1                |
| SWCNT/graphite                    | PET                            | spray coating             | 90                                          | <u>0.16%</u>                                          | 5.0         | Unclear       | 2                |
| GNPs/Polysilazane                 | Al <sub>2</sub> O <sub>3</sub> | Direct ink writing        | 500                                         | <u>0.04%</u>                                          | 19.1        | -3.7          | 3                |
| AgNWs/graphene                    | PDMS                           | Drop coating              | 90                                          | 40%                                                   | 80          | 160           | 4                |
| AgNPs/CNT                         | Silicone                       | Drop coating              | 60                                          | 100%                                                  | 38.2        | -11.6         | 5                |
| MWCNT/graphene                    | Polyimide                      | Drop coating              | Room temperature                            | Unclear                                               | 16.2        | Unclear       | 6                |
| graphene/CNT/silicone             | -                              | Direct ink writing        | Room temperature                            | 100%                                                  | 10.7        | 114           | 7                |
| P3HT/BCF/AgNPs                    | Polyimide                      | Spin coating              | 80                                          | 6.1%                                                  | 64          | 1100          | 8                |
| PEDOT:PSS/DMSO                    | PET                            | Spin coating              | 120                                         | 2%                                                    | 1.9         | 93            | 9                |
| AgNPs                             | PET                            | Spin coating              | Unclear                                     | 1%                                                    | 51          | 19            | 10               |
| <b>Nano-SiO<sub>2</sub>/AgNPs</b> | <b>Alloy steel</b>             | <b>Direct ink writing</b> | <b>150</b>                                  | <b><u>0.2%</u></b>                                    | <b>16.4</b> | <b>30</b>     | <b>This work</b> |

PET: polyethylene terephthalate, SWCNT: single-wall carbon nanotube, GNPs: graphite nanoplatelets, AgNWs: silver nanowires, PDMS: polydimethylsiloxane, AgNPs: silver nanoparticles, CNT: carbon nanotubes, MWCNT: multi-walled carbon nanotubes, P3HT: poly(3-hexylthiophene-2,5-diyl), BCF: tris(pentafluorophenyl)borane, PEDOT: poly(3,4-ethylenedioxythiophene), PSS: poly(styrenesulfonate), DMSO: dimethyl sulfoxide

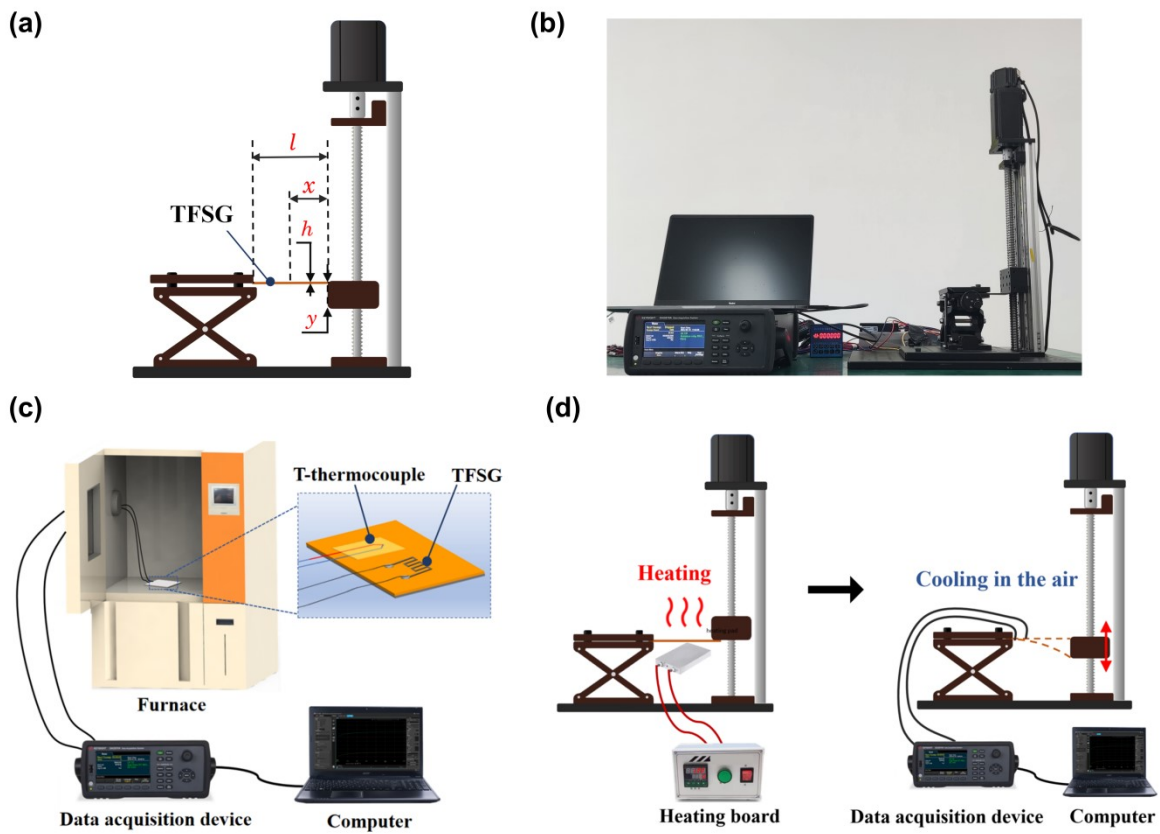

**Fig. S1.** (a) Experiment setup for strain response detection. (b) Platform for strain testing and acquisition. (c) Experiment setup for temperature-resistance detection. (d) Experiment setup for dynamic response detection under variable temperature environments.

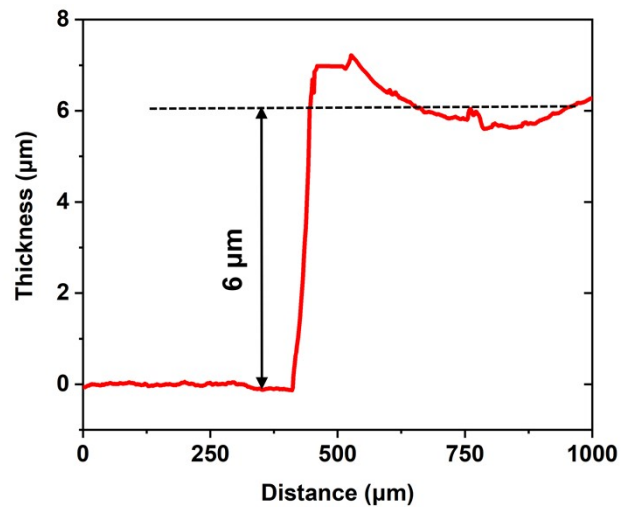

**Fig. S2.** The thickness of PI insulation film is close to 6  $\mu\text{m}$ .

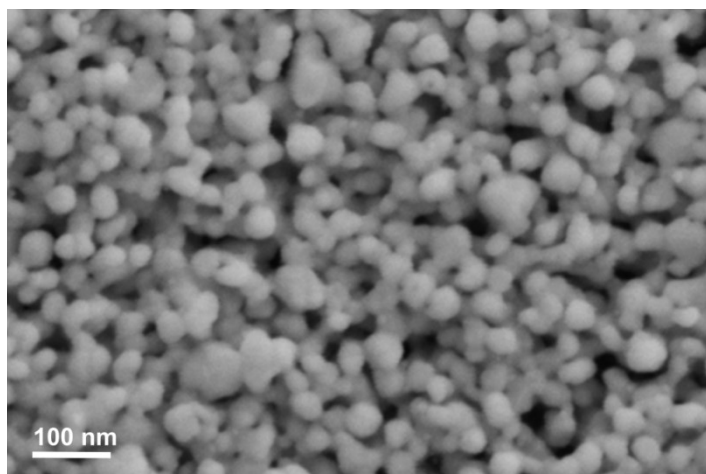

**Fig. S3.** SEM image of AgNPs thin films.

## References

1. D. Zymelka, T. Yamashita, X. Sun and T. Kobayashi, *Journal*, 2020, **20**.
2. S. Luo and T. Liu, *Advanced Materials*, 2013, **25**, 5650-5657.
3. C. Wu, F. Lin, X. Pan, Y. Zeng, G. Chen, L. Xu, Y. He, G. He, Q. Chen, D. Sun and Z. Hai, *Chemical Engineering Journal*, 2023, **457**, 141269.
4. S. Niu, X. Chang, Z. Zhu, Z. Qin, J. Li, Y. Jiang, D. Wang, C. Yang, Y. Gao and S. Sun, *ACS Applied Materials & Interfaces*, 2021, **13**, 55307-55318.
5. S. Niu, S. He, Y. Chen, Z. Zhu, X. Chang, C. Yang, J. Li, Y. Jiang, D. Wang, Y. Zhu and S. Sun, *Advanced Materials Technologies*, 2023, **8**, 2300867.
6. R. Ramalingame, J. R. Bautista-Quijano, D. D. Alves and O. Kanoun, *Journal*, 2019, **3**.
7. W.-B. Zhu, S.-S. Xue, H. Zhang, Y.-Y. Wang, P. Huang, Z.-H. Tang, Y.-Q. Li and S.-Y. Fu, *Journal of Materials Chemistry C*, 2022, **10**, 8226-8233.
8. Y. Kato, K. Fukuda, T. Someya and T. Yokota, *Journal of Materials Chemistry C*, 2023, **11**, 14070-14078.
9. Y. K. Choi, T. H. Kim, J. H. Song, B. K. Jung, W. Kim, J. H. Bae, H. J. Choi, J. Kwak, J. W. Shim and S. J. Oh, *Nanoscale*, 2023, **15**, 7980-7990.
10. Y. K. Choi, T. Park, D. H. D. Lee, J. Ahn, Y. H. Kim, S. Jeon, M. J. Han and S. J. Oh, *Nanoscale*, 2022, **14**, 8628-8639.
